# Supplementary material for: Pulsed Electric Field Processing of Red Grapes (cv. Rondinella): Modifications of Phenolic Fraction and Effects on Wine Evolution
Source: Foods. 2020 Apr 2;9(4):414. doi: 10.3390/foods9040414 (PMC7230476; doi:10.3390/foods9040414)
Supplement: Supplementary file 1 [file foods-09-00414-s001.pdf]

## Supplementary Material

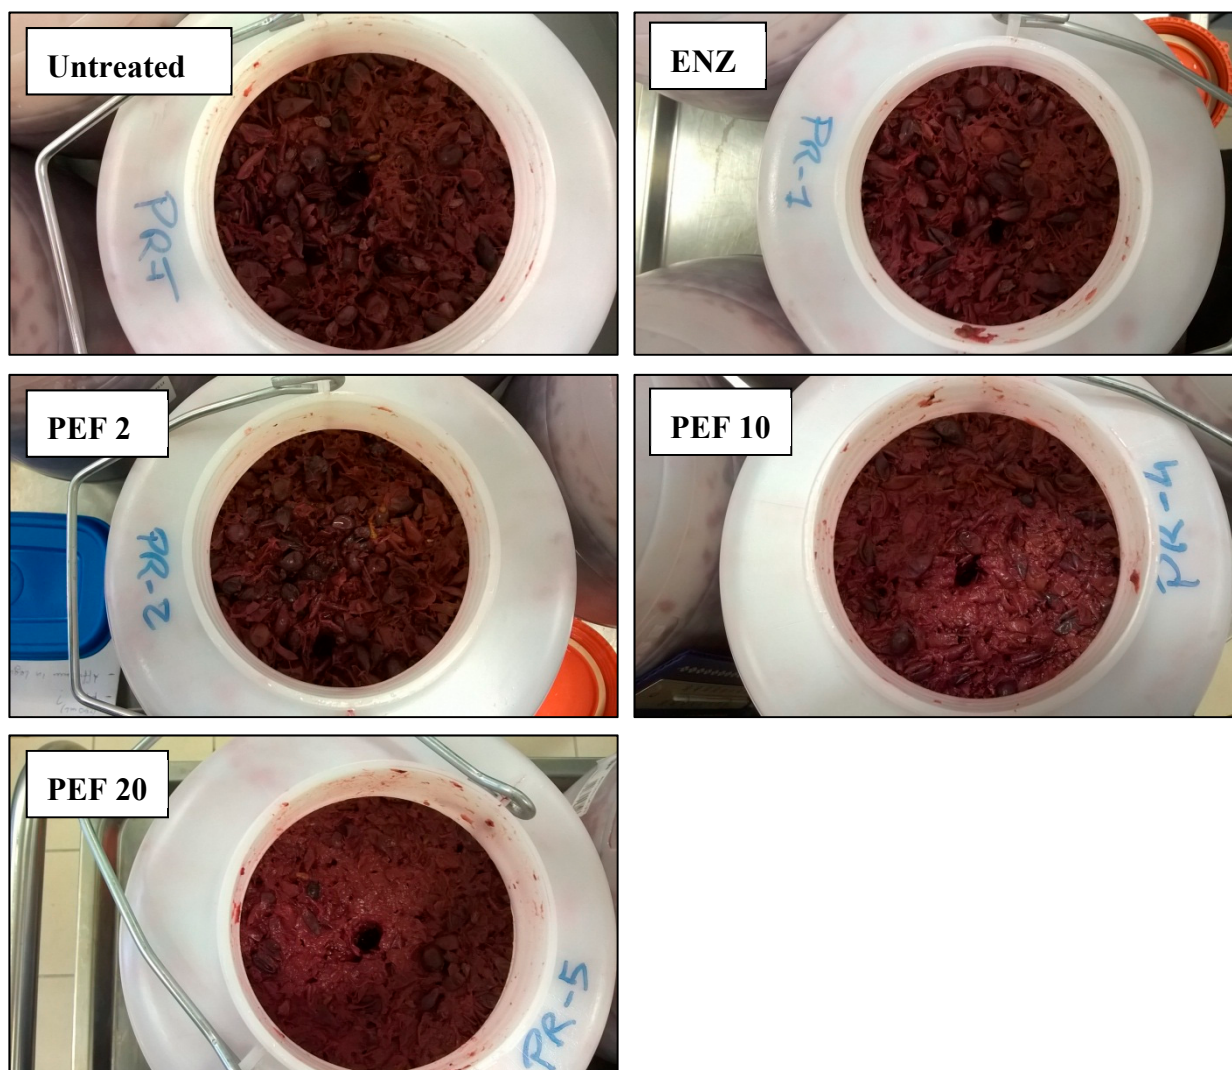

**Figure S1.** Samples at the third day of maceration, showing the greater breakdown of the skin integrity, for the treatments with higher specific energy. Pictures taken before punching-down the pomace. Untreated: control, no treatment; ENZ: pectolytic enzymes ( $20 \text{ mg kg}^{-1}$ ); PEF 2: PEF treatment,  $2 \text{ kJ kg}^{-1}$ ; PEF 10: PEF treatment,  $10 \text{ kJ kg}^{-1}$ ; PEF 20: PEF treatment,  $20 \text{ kJ kg}^{-1}$ . PEF, pulsed electric field.
